# Supplementary material for: Protective Effect of Metformin against Hydrogen Peroxide-Induced Oxidative Damage in Human Retinal Pigment Epithelial (RPE) Cells by Enhancing Autophagy through Activation of AMPK Pathway
Source: PubMed Central journal article supplement (PMC7397438; doi:10.1155/2020/2524174), 2020-07-24
Supplement: 2524174.f1.pdf [file 2524174.f1.pdf]

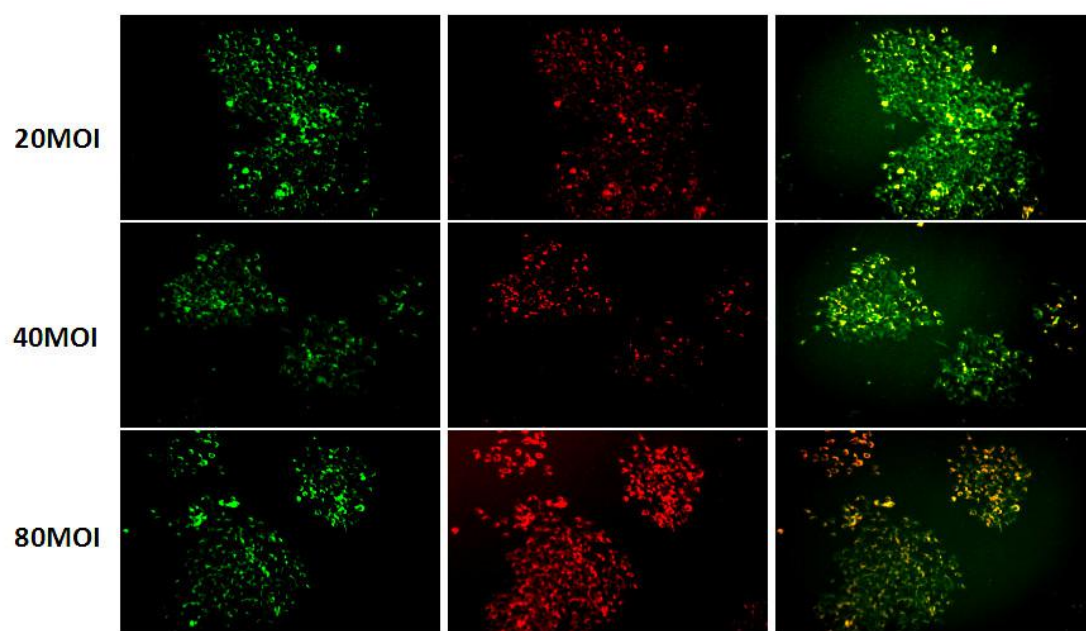

**Fig.s1. The optimal infection efficiency of the RFP-GFP-LC3 lentiviral is 80MOI.** D407 cells were infected with RFP-GFP-LC3 lentivirus with different MOI (20,40,80). Images were taken after 48h by using a Nikon A1 confocal microscope .
